# Supplementary material for: Assessment of Pretreatment With Oral P2Y12 Inhibitors and Cardiovascular and Bleeding Outcomes in Patients With Non-ST Elevation Acute Coronary Syndromes: A Systematic Review and Meta-analysis
Source: PubMed Central journal article supplement (PMC8605486; doi:10.1001/jamanetworkopen.2021.34322), 2021-11-19
Supplement: jamanetwopen-e2134322-s001.pdf [file jamanetwopen-e2134322-s001.pdf]

## Supplemental Online Content

Dawson LP, Chen D, Dagan M, et al. Assessment of pretreatment with oral P2Y12 inhibitors and cardiovascular and bleeding outcomes in patients with non-ST elevation acute coronary syndromes. *JAMA Netw Open*. 2021;4(11):e2134322. doi:10.1001/jamanetworkopen.2021.34322

**eTable 1.** Details of Search Strategy

**eTable 2.** End Point Definitions by Study

**eTable 3.** Risk of Bias (RoB 2) Output

**eTable 4.** Summary of Observational Studies Available Assessing P2Y12 Inhibitor Timing in NSTEMI

**eFigure 1.** Risk of Bias (RoB 2) Summary

**eFigure 2.** Funnel Plots

**eFigure 3.** Sensitivity Analysis Using a Fixed-Effects Model

**eFigure 4.** Sensitivity Analysis Excluding PCI CURE From P2Y12 Inhibitor Subgroup Analysis

**eFigure 5.** Subgroup Analyses for the Primary Safety End Point (Bleeding)

**eFigure 6.** Leave-One-Out Sensitivity Analyses

**eFigure 7.** Metaregression Assessing Timing of Pretreatment Loading Dose

**eReferences.**

This supplemental material has been provided by the authors to give readers additional information about their work.

**eTable 1. Details of Search Strategy**

| Database                  | Search Strategy                                                                                                                                                                                                                                                                                                                                                                                                                                                                                                                                                                                                                                                                                                                                                                                                                                                                                                                                                                                                                                                                                                                                                                                                                                                                                                                                                                                                                                                                                                                                                                                                                                                                                                                                                                                                                                                                                                                                                                                                                                                                                                                                                                 | Results |
|---------------------------|---------------------------------------------------------------------------------------------------------------------------------------------------------------------------------------------------------------------------------------------------------------------------------------------------------------------------------------------------------------------------------------------------------------------------------------------------------------------------------------------------------------------------------------------------------------------------------------------------------------------------------------------------------------------------------------------------------------------------------------------------------------------------------------------------------------------------------------------------------------------------------------------------------------------------------------------------------------------------------------------------------------------------------------------------------------------------------------------------------------------------------------------------------------------------------------------------------------------------------------------------------------------------------------------------------------------------------------------------------------------------------------------------------------------------------------------------------------------------------------------------------------------------------------------------------------------------------------------------------------------------------------------------------------------------------------------------------------------------------------------------------------------------------------------------------------------------------------------------------------------------------------------------------------------------------------------------------------------------------------------------------------------------------------------------------------------------------------------------------------------------------------------------------------------------------|---------|
| MEDLINE                   | [pretreatment.mp OR upstream.mp OR up front.mp OR before PCI.mp OR early.mp OR loading.mp OR timing.mp OR pre-hospital.mp] AND [P2Y12 inhibitor.mp OR Purinergic P2Y Receptor Antagonist/ OR clopidogrel.mp OR Clopidogrel/ OR prasugrel.mp OR Prasugrel Hydrochloride/ OR ticagrelor.mp OR Ticagrelor/] AND [Percutaneous Coronary Intervention/ OR Acute Coronary Syndrome/ OR Non-ST Elevated Myocardial Infarction/ OR nsteacs.mp OR Coronary Angiography/ or Myocardial Infarction/ OR ischemic heart disease.mp OR Myocardial Ischemia/]; limited to humans, English, and year 2000 to current                                                                                                                                                                                                                                                                                                                                                                                                                                                                                                                                                                                                                                                                                                                                                                                                                                                                                                                                                                                                                                                                                                                                                                                                                                                                                                                                                                                                                                                                                                                                                                            | 1336    |
| PubMed                    | ((("P2Y12"[All Fields] AND ("antagonists and inhibitors"[MeSH Subheading] OR ("antagonists"[All Fields] AND "inhibitors"[All Fields]) OR "antagonists and inhibitors"[All Fields] OR "inhibitors"[All Fields] OR "inhibitor"[All Fields] OR "inhibitor s"[All Fields])) OR ("clopidogrel"[MeSH Terms] OR "clopidogrel"[All Fields] OR "clopidogrel s"[All Fields]) OR ("prasugrel hydrochloride"[MeSH Terms] OR "prasugrel"[All Fields] AND "hydrochloride"[All Fields]) OR "prasugrel hydrochloride"[All Fields] OR "prasugrel"[All Fields] OR "prasugrel s"[All Fields]) OR ("ticagrelor"[MeSH Terms] OR "ticagrelor"[All Fields])) AND ("non st elevated myocardial infarction"[MeSH Terms] OR ("non-st"[All Fields] AND "elevated"[All Fields] AND "myocardial"[All Fields] AND "infarction"[All Fields]) OR "non st elevated myocardial infarction"[All Fields] OR ("non"[All Fields] AND "st"[All Fields] AND "elevation"[All Fields] AND "myocardial"[All Fields] AND "infarction"[All Fields]) OR "non st elevation myocardial infarction"[All Fields] OR ("non-st"[All Fields] AND ("elevate"[All Fields] OR "elevated"[All Fields] OR "elevates"[All Fields] OR "elevating"[All Fields] OR "elevation"[All Fields] OR "elevational"[All Fields] OR "elevations"[All Fields]) AND ("acute coronary syndrome"[MeSH Terms] OR ("acute"[All Fields] AND "coronary"[All Fields] AND "syndrome"[All Fields]) OR "acute coronary syndrome"[All Fields])) OR ("acute coronary syndrome"[MeSH Terms] OR ("acute"[All Fields] AND "coronary"[All Fields] AND "syndrome"[All Fields]) OR "acute coronary syndrome"[All Fields])) AND ("pretreat"[All Fields] OR "pretreated"[All Fields] OR "pretreating"[All Fields] OR "pretreatment"[All Fields] OR "pretreatments"[All Fields] OR ("upstream"[All Fields] OR "upstreams"[All Fields]) OR ("up"[All Fields] AND ("front"[All Fields] OR "front s"[All Fields] OR "fronts"[All Fields])) OR "early"[All Fields] OR ("loaded"[All Fields] OR "loading"[All Fields] OR "loadings"[All Fields] OR "loads"[All Fields]) OR ("timely"[All Fields] OR "timing"[All Fields] OR "timings"[All Fields]) OR "pre-hospital"[All Fields])) | 1064    |
| Embase                    | [pretreatment.mp OR upstream.mp OR up front.mp OR before PCI.mp OR early.mp OR loading.mp OR timing.mp OR pre-hospital.mp] AND [clopidogrel/ OR purinergic P2Y12 receptor/ OR prasugrel/ OR P2Y12 inhibitor.mp OR ticagrelor/] AND [acute coronary syndrome.mp OR acute coronary syndrome/ OR non-st elevation myocardial infarction.mp OR non ST segment elevation myocardial infarction/ or non st segment elevation acute coronary syndrome/ or nsteacs.mp]; limited to humans and English language and yr="2000-Current"                                                                                                                                                                                                                                                                                                                                                                                                                                                                                                                                                                                                                                                                                                                                                                                                                                                                                                                                                                                                                                                                                                                                                                                                                                                                                                                                                                                                                                                                                                                                                                                                                                                    | 4166    |
| Scopus                    | (pretreatment OR upstream OR "up front" OR "before PCI" OR early OR loading OR timing OR pre-hospital) AND ("P2Y12 inhibitor" OR clopidogrel OR prasugrel OR ticagrelor) AND ("non-ST elevation myocardial infarction" OR "non-ST acute coronary syndrome") AND (LIMIT-TO (PUBYEAR, 2021) OR LIMIT-TO (PUBYEAR, 2020) OR LIMIT-TO (PUBYEAR, 2019) OR LIMIT-TO (PUBYEAR, 2018) OR LIMIT-TO (PUBYEAR, 2017) OR LIMIT-TO (PUBYEAR, 2016) OR LIMIT-TO (PUBYEAR, 2015) OR LIMIT-TO (PUBYEAR, 2014) OR LIMIT-TO (PUBYEAR, 2013) OR LIMIT-TO (PUBYEAR, 2012) OR LIMIT-TO (PUBYEAR, 2011) OR LIMIT-TO (PUBYEAR, 2010) OR LIMIT-TO (PUBYEAR, 2009) OR LIMIT-TO (PUBYEAR, 2008) OR LIMIT-TO (PUBYEAR, 2007) OR LIMIT-TO (PUBYEAR, 2006) OR LIMIT-TO (PUBYEAR, 2005) OR LIMIT-TO (PUBYEAR, 2004) OR LIMIT-TO (PUBYEAR, 2003) OR LIMIT-TO (PUBYEAR, 2002) OR LIMIT-TO (PUBYEAR, 2001) OR LIMIT-TO (PUBYEAR, 2000)) AND (LIMIT-TO (LANGUAGE, "English"))                                                                                                                                                                                                                                                                                                                                                                                                                                                                                                                                                                                                                                                                                                                                                                                                                                                                                                                                                                                                                                                                                                                                                                                                                                     | 3532    |
| Web of Science            | ALL=(pretreatment OR upstream OR "up front" OR "before PCI" OR early OR loading OR timing OR pre-hospital) AND ALL=("P2Y12 inhibitor" OR clopidogrel OR ticagrelor OR prasugrel) AND ALL=("acute coronary syndrome" OR "non-ST elevation myocardial infarction" OR "non-ST acute coronary syndrome") AND LANGUAGE: (English) Indexes=SCI-EXPANDED, SSCI, A&HCI, CPCI-S, CPCI-SSH, BKCI-S, BKCI-SSH, ESCI, CCR-EXPANDED, IC Timespan=2000-2021                                                                                                                                                                                                                                                                                                                                                                                                                                                                                                                                                                                                                                                                                                                                                                                                                                                                                                                                                                                                                                                                                                                                                                                                                                                                                                                                                                                                                                                                                                                                                                                                                                                                                                                                   | 1225    |
| Science Direct            | (pretreatment OR timing OR early OR upstream) AND (clopidogrel OR ticagrelor OR prasugrel) AND ("non-ST elevation myocardial infarction" OR "non-ST acute coronary syndrome"); Year(s) 2000-2021                                                                                                                                                                                                                                                                                                                                                                                                                                                                                                                                                                                                                                                                                                                                                                                                                                                                                                                                                                                                                                                                                                                                                                                                                                                                                                                                                                                                                                                                                                                                                                                                                                                                                                                                                                                                                                                                                                                                                                                | 1360    |
| clinicaltrials.gov        | (pretreatment OR upstream OR up front OR before PCI OR early OR loading OR timing OR pre-hospital) AND (P2Y12 inhibitor OR clopidogrel OR ticagrelor OR prasugrel) AND (acute coronary syndrome OR non-ST elevation myocardial infarction)                                                                                                                                                                                                                                                                                                                                                                                                                                                                                                                                                                                                                                                                                                                                                                                                                                                                                                                                                                                                                                                                                                                                                                                                                                                                                                                                                                                                                                                                                                                                                                                                                                                                                                                                                                                                                                                                                                                                      | 154     |
| Cochrane Central Register | [(coronary angiography) OR (myocardial infarction) OR ("ischaemic heart disease") OR (ischemic heart disease) OR ("myocardial ischemia") OR (percutaneous coronary intervention) OR ("percutaneous coronary revascularisation") OR (acute coronary syndrome) OR ("NSTEMI")]                                                                                                                                                                                                                                                                                                                                                                                                                                                                                                                                                                                                                                                                                                                                                                                                                                                                                                                                                                                                                                                                                                                                                                                                                                                                                                                                                                                                                                                                                                                                                                                                                                                                                                                                                                                                                                                                                                     | 1819    |

|                      |                                                                                                                                                                                                                                                                                                                                                       |  |
|----------------------|-------------------------------------------------------------------------------------------------------------------------------------------------------------------------------------------------------------------------------------------------------------------------------------------------------------------------------------------------------|--|
| of Controlled Trials | OR (nsteacs)] AND [“loading dose”) OR (loading) OR (timing) OR (“pre-hospital treatment”) OR (pre-hospital) OR (pretreatment) OR (upstream) OR (up front) OR (before PCI) OR (early)] AND [(prasugrel) OR (clopidogrel) OR (ticagrelor) OR (P2Y12 inhibitor); with Publication Year from 2000 to 2021, in Trials (Word variations have been searched) |  |
|----------------------|-------------------------------------------------------------------------------------------------------------------------------------------------------------------------------------------------------------------------------------------------------------------------------------------------------------------------------------------------------|--|

**eTable 2. End Point Definitions by Study**

| Study                                                                                                                                                                                                                                                                                                                                                                                                                                                                                                                                                                                                                               | Time point | Primary endpoint (MACE)                                              | Major Bleeding                                                                                                                                                                                   |
|-------------------------------------------------------------------------------------------------------------------------------------------------------------------------------------------------------------------------------------------------------------------------------------------------------------------------------------------------------------------------------------------------------------------------------------------------------------------------------------------------------------------------------------------------------------------------------------------------------------------------------------|------------|----------------------------------------------------------------------|--------------------------------------------------------------------------------------------------------------------------------------------------------------------------------------------------|
| CURE PCI <sup>1</sup>                                                                                                                                                                                                                                                                                                                                                                                                                                                                                                                                                                                                               | 30d        | CV death, MI, urgent target vessel revascularisation                 | Major (fatal, Hb drop $\geq 50\text{g/L}$ , caused hypotension requiring inotropes or surgery, intracranial haemorrhage, $\geq 4$ units transfusion) or minor (interruption of study medication) |
| CREDO <sup>2</sup>                                                                                                                                                                                                                                                                                                                                                                                                                                                                                                                                                                                                                  | 28d        | Death, MI, urgent target vessel revascularisation                    | TIMI major or minor                                                                                                                                                                              |
| ARMYDA-5 <sup>3</sup>                                                                                                                                                                                                                                                                                                                                                                                                                                                                                                                                                                                                               | 30d        | CV death, MI, target vessel revascularisation                        | TIMI major or minor                                                                                                                                                                              |
| ACCOAST <sup>4,5</sup>                                                                                                                                                                                                                                                                                                                                                                                                                                                                                                                                                                                                              | 30d        | CV death, MI, urgent revascularisation                               | TIMI major or minor                                                                                                                                                                              |
| Bonello et al <sup>6</sup>                                                                                                                                                                                                                                                                                                                                                                                                                                                                                                                                                                                                          | 30d        | CV death, MI, urgent revascularisation, stroke                       | BARC score 3,4,5                                                                                                                                                                                 |
| ISAR-REACT 5 <sup>7</sup>                                                                                                                                                                                                                                                                                                                                                                                                                                                                                                                                                                                                           | 30d        | Death, MI, stroke                                                    | BARC score 3,4,5                                                                                                                                                                                 |
| DUBIUS <sup>8</sup>                                                                                                                                                                                                                                                                                                                                                                                                                                                                                                                                                                                                                 | 30d        | CV death, MI, non-fatal stroke, major or fatal bleeding (BARC $>2$ ) | BARC score 3,4,5                                                                                                                                                                                 |
| TIMI major: intracranial haemorrhage, $\geq 5\text{g/dl}$ decrease in Hb, or $\geq 15\%$ decrease in Hct<br>TIMI minor: 3-5g/dl decrease in Hb with clinically overt bleeding<br>BARC 3: overt bleeding plus Hb drop of $\geq 3\text{dL}$ , any transfusion, intracranial haemorrhage, tamponade, bleeding requiring surgical intervention<br>BARC 4: CABG related bleeding, perioperative intracranial bleeding within 48h, reoperation after closure of sternotomy to control bleeding, transfusion $\geq 5$ units within 48h period, chest tube output $\geq 2\text{L}$ within 24 hours<br>BARC 5: fatal bleeding<br>Mehran 2011 |            |                                                                      |                                                                                                                                                                                                  |

**eTable 3. Risk of Bias (RoB 2) Output**

| Question           | DUBIUS          | ISAR-REACT5     | ACCOAST         | ARMYDA-5        | CREDO           | Bonello et al        | CURE PCI        |
|--------------------|-----------------|-----------------|-----------------|-----------------|-----------------|----------------------|-----------------|
| 1.1                | Yes             | Yes             | Yes             | Yes             | Yes             | Yes                  | Yes             |
| 1.2                | Yes             | Yes             | Yes             | Probably yes    | Yes             | Probably yes         | Yes             |
| 1.3                | No              | No              | No              | No              | No              | No                   | No              |
| <b>1 Overall</b>   | <b>Low risk</b> | <b>Low risk</b> | <b>Low risk</b> | <b>Low risk</b> | <b>Low risk</b> | <b>Low risk</b>      | <b>Low risk</b> |
| 2.1                | Yes             | Yes             | No              | Yes             | No              | Yes                  | No              |
| 2.2                | Yes             | Yes             | No              | Yes             | No              | Yes                  | No              |
| 2.3                | No              | No              | n/a             | No              | n/a             | No                   | n/a             |
| 2.4                | n/a             | n/a             | n/a             | n/a             | n/a             | n/a                  | n/a             |
| 2.5                | n/a             | n/a             | n/a             | n/a             | n/a             | n/a                  | n/a             |
| 2.6                | Yes             | Yes             | Yes             | Yes             | Yes             | No information       | Yes             |
| 2.7                | n/a             | n/a             | n/a             | n/a             | n/a             | n/a                  | n/a             |
| <b>2 Overall</b>   | <b>Low risk</b> | <b>Low risk</b> | <b>Low risk</b> | <b>Low risk</b> | <b>Low risk</b> | <b>Some concerns</b> | <b>Low risk</b> |
| 3.1                | Yes             | Yes             | Yes             | Probably yes    | Yes             | Yes                  | Yes             |
| 3.2                | n/a             | n/a             | n/a             | n/a             | n/a             | n/a                  | n/a             |
| 3.3                | n/a             | n/a             | n/a             | n/a             | n/a             | n/a                  | n/a             |
| 3.4                | n/a             | n/a             | n/a             | n/a             | n/a             | n/a                  | n/a             |
| <b>3 Overall</b>   | <b>Low risk</b> | <b>Low risk</b> | <b>Low risk</b> | <b>Low risk</b> | <b>Low risk</b> | <b>Low risk</b>      | <b>Low risk</b> |
| 4.1                | No              | No              | No              | No              | No              | No                   | No              |
| 4.2                | No              | No              | No              | No              | No              | No                   | No              |
| 4.3                | n/a             | n/a             | n/a             | Yes             | n/a             | n/a                  | n/a             |
| 4.4                | n/a             | n/a             | n/a             | No              | n/a             | n/a                  | n/a             |
| 4.5                | n/a             | n/a             | n/a             | n/a             | n/a             | n/a                  | n/a             |
| <b>4 Overall</b>   | <b>Low risk</b> | <b>Low risk</b> | <b>Low risk</b> | <b>Low risk</b> | <b>Low risk</b> | <b>Low risk</b>      | <b>Low risk</b> |
| 5.1                | Yes             | Yes             | Yes             | Yes             | Yes             | No information       | Yes             |
| 5.2                | No              | No              | No              | No              | No              | Probably no          | No              |
| 5.3                | No              | No              | No              | No              | No              | Probably no          | No              |
| <b>5 Overall</b>   | <b>Low risk</b> | <b>Low risk</b> | <b>Low risk</b> | <b>Low risk</b> | <b>Low risk</b> | <b>Some concerns</b> | <b>Low risk</b> |
| <b>Overall RoB</b> | <b>Low risk</b> | <b>Low risk</b> | <b>Low risk</b> | <b>Low risk</b> | <b>Low risk</b> | <b>Some concerns</b> | <b>Low risk</b> |

**eTable 4. Summary of Observational Studies Available Assessing P2Y12 Inhibitor Timing in NSTEMI/ACS**

| Study                              | Year | N      | Population      | Pre-treatment | Impact on MACE | Impact on bleeding | Results                                                                                                                                                         |
|------------------------------------|------|--------|-----------------|---------------|----------------|--------------------|-----------------------------------------------------------------------------------------------------------------------------------------------------------------|
| Dworeck et al <sup>19</sup>        | 2020 | 64,857 | NSTEMI/ACS      | Any           | -              | ↑                  | Pre-treatment not associated with improved clinical outcomes but was associated with increased risk of bleeding.                                                |
| Verdoia et al <sup>10</sup>        | 2018 | 168    | SIHD/NSTEMI/ACS | Any           | -              | n/a                | No difference in MI or periprocedural myonecrosis.                                                                                                              |
| Sukul et al <sup>11</sup>          | 2017 | 24,733 | Mixed           | Any           | -              | -                  | No differences in outcomes between pre-treatment and no pre-treatment.                                                                                          |
| Yudi et al <sup>12</sup>           | 2015 | 6,817  | NSTEMI/ACS      | Any           | -              | -                  | No difference in 30-day mortality, MACE or bleeding complications.                                                                                              |
| Ikegami et al <sup>13</sup>        | 2015 | 6,528  | ACS             | Any           | ↓              | -                  | Pre-treatment associated with reduced MACE and no difference in bleeding endpoints.                                                                             |
| Almendro-delia et al <sup>14</sup> | 2015 | 9,621  | NSTEMI/ACS      | Clopidogrel   | -              | ↑                  | No difference in reinfarction, stent thrombosis, or mortality among NSTEMI/ACS subgroup.                                                                        |
| Wang et al <sup>15</sup>           | 2011 | 9,166  | NSTEMI/ACS      | Clopidogrel   | -              | ↑                  | No interaction between upstream clopidogrel administration with randomized eptifibatid for MACE, but increased risk of bleeding with both (EARLY ACS substudy). |
| Feldman et al <sup>16</sup>        | 2010 | 1,041  | NSTEMI/ACS      | Clopidogrel   | -              | -                  | No difference in MACE or bleeding complications.                                                                                                                |
| Lincoff et al <sup>17</sup>        | 2008 | 13,819 | NSTEMI/ACS      | Clopidogrel   | ↓              | -                  | Post-hoc analysis of the ACUITY trial, increase in ischemic events for patients not pre-treated if randomized to bivalirudin                                    |
| Szuk et al <sup>18</sup>           | 2007 | 4,160  | Mixed           | Clopidogrel   | ↓              | ↑                  | Pre-treatment associated with increased MACE and higher major bleeding.                                                                                         |
| Dery et al <sup>19</sup>           | 2007 | 2,040  | Mixed           | Clopidogrel   | ↓              | -                  | Pre-treatment associated with reduced MACE and no impact on bleeding (ESPRIT substudy).                                                                         |
| Chan et al <sup>20</sup>           | 2003 | 4,809  | Mixed           | Clopidogrel   | ↓              | -                  | Clopidogrel pre-treatment associated with reduced death and MI irrespective of GP IIb/IIIa inhibitor used (TARGET substudy).                                    |
| Assali et al <sup>21</sup>         | 2001 | 299    | Mixed           | Clopidogrel   | ↓              | -                  | Reduced MACE and no difference on bleeding endpoints                                                                                                            |

**eFigure 1. Risk of Bias (RoB 2) Summary**

Upper panel shows weighted summary for all studies, while lower panel shows risk of bias by domain for each individual study.

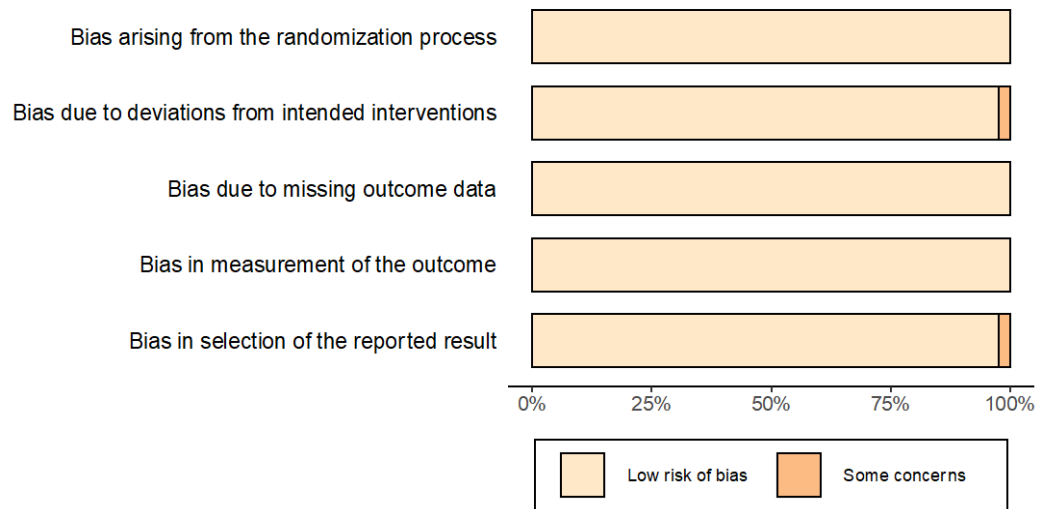

| Study         | Risk of bias domains |    |    |    |    | Overall |
|---------------|----------------------|----|----|----|----|---------|
|               | D1                   | D2 | D3 | D4 | D5 |         |
| DUBIUS        | +                    | +  | +  | +  | +  | +       |
| AR-REACT      | +                    | +  | +  | +  | +  | +       |
| ACCOAST       | +                    | +  | +  | +  | +  | +       |
| ARMYDA-5      | +                    | +  | +  | +  | +  | +       |
| CREDO         | +                    | +  | +  | +  | +  | +       |
| PCI           | +                    | +  | +  | +  | +  | +       |
| CURE          | +                    | +  | +  | +  | +  | +       |
| Bonello et al | +                    | -  | +  | +  | -  | -       |

Domains:  
 D1: Bias due to randomisation.  
 D2: Bias due to deviations from intended intervention.  
 D3: Bias due to missing data.  
 D4: Bias due to outcome measurement.  
 D5: Bias due to selection of reported result.

Judgement  
 + Low  
 - Some concerns

## eFigure 2. Funnel Plots

eFigure 2a. Funnel plot for 30-day major adverse cardiac events (Egger's test,  $p=0.78$ )

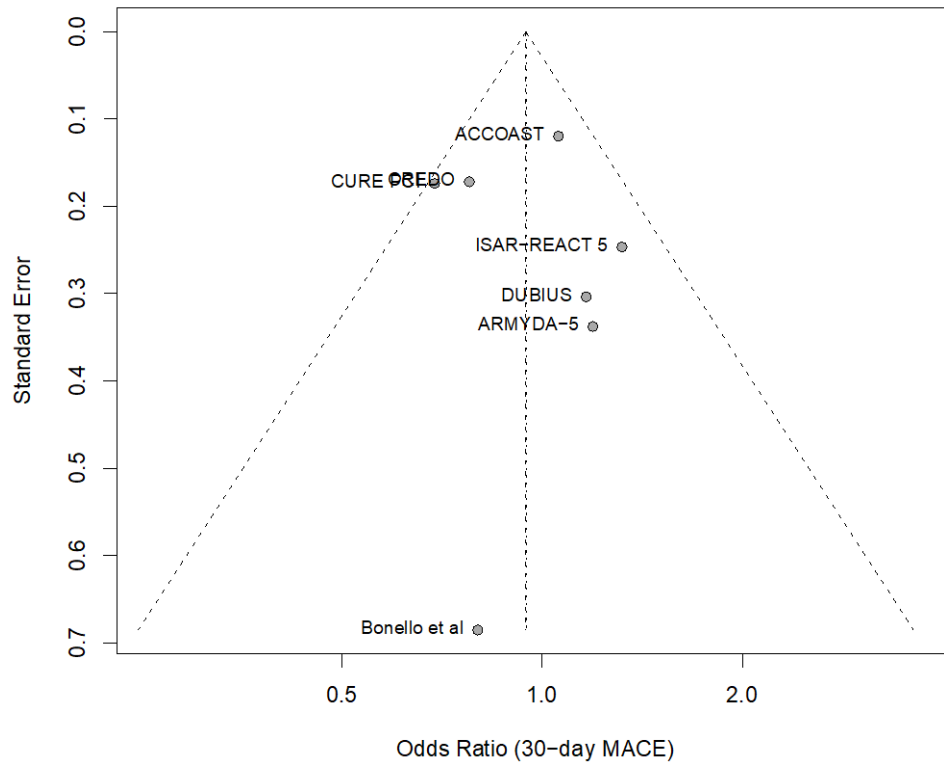

eFigure 2b. Funnel plot for 30-day myocardial infarction (Egger's test,  $p=0.73$ )

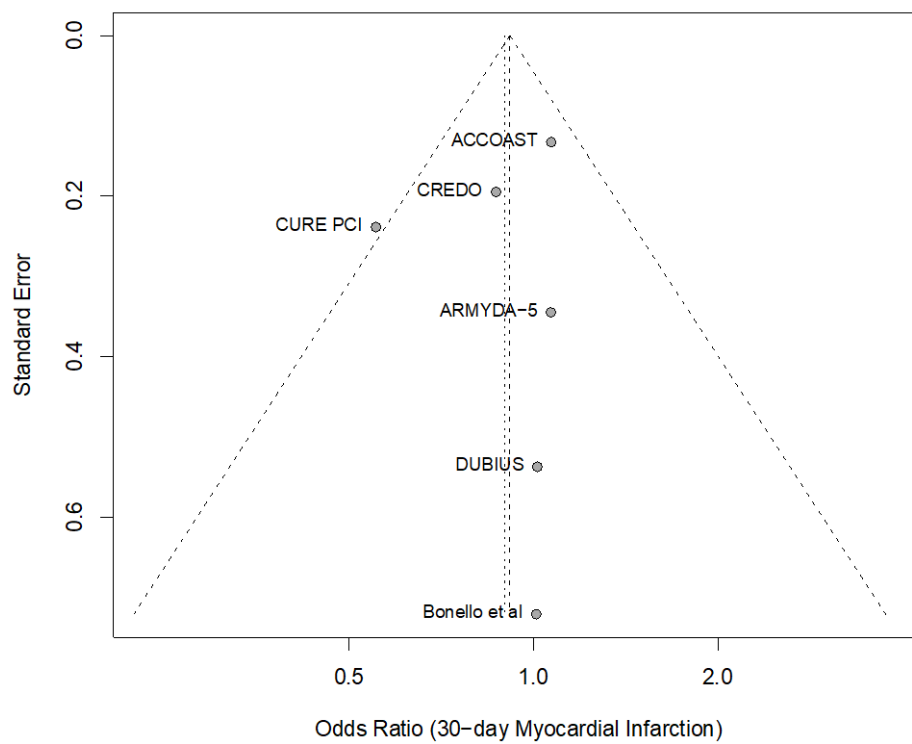



**eFigure 2c.** Funnel plot for 30-day cardiovascular death (Egger's test,  $p=0.87$ )

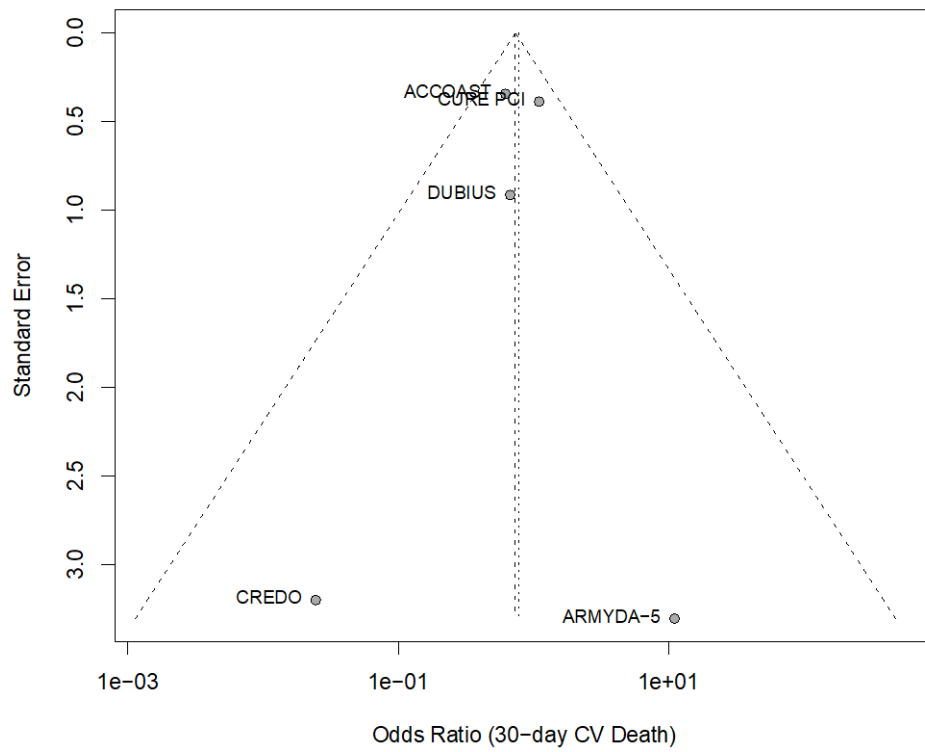

**eFigure 2d.** Funnel plot for 30-day major bleeding (Egger's test,  $p=0.29$ )

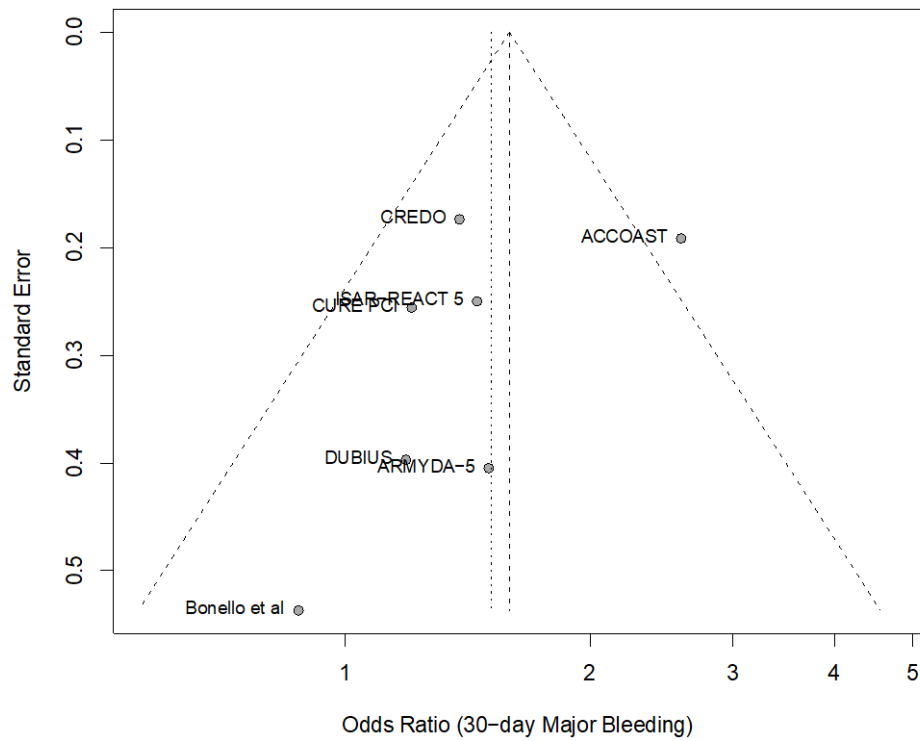

eFigure 3. Sensitivity Analysis Using a Fixed-Effects Model

(A) 30-day MACE, (B) 30-day myocardial infarction, (C) 30-day cardiovascular death, and (D) 30-day major bleeding.

### A

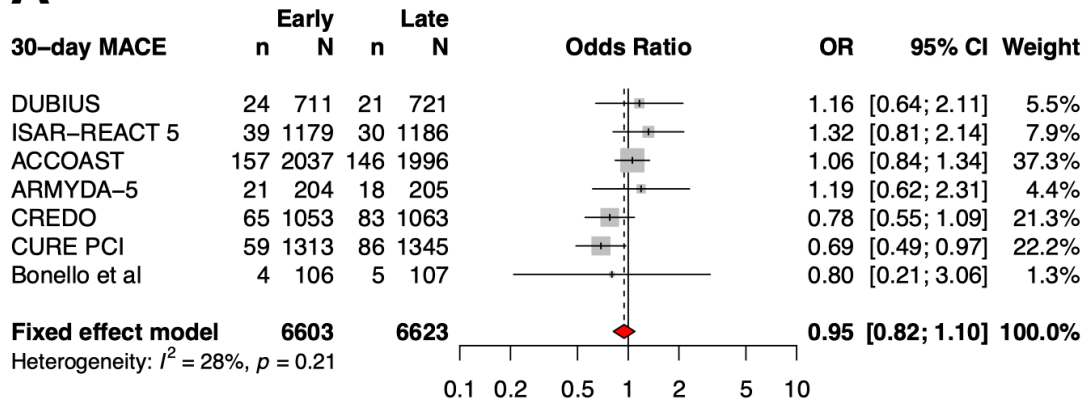

### B

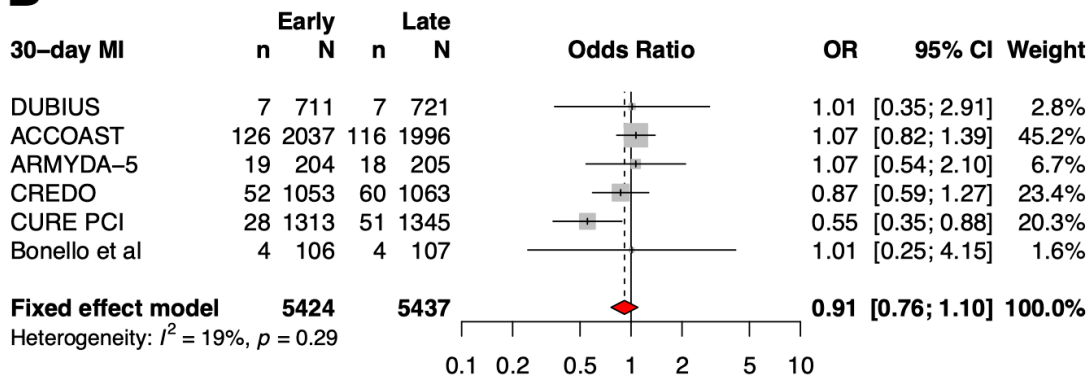

### C

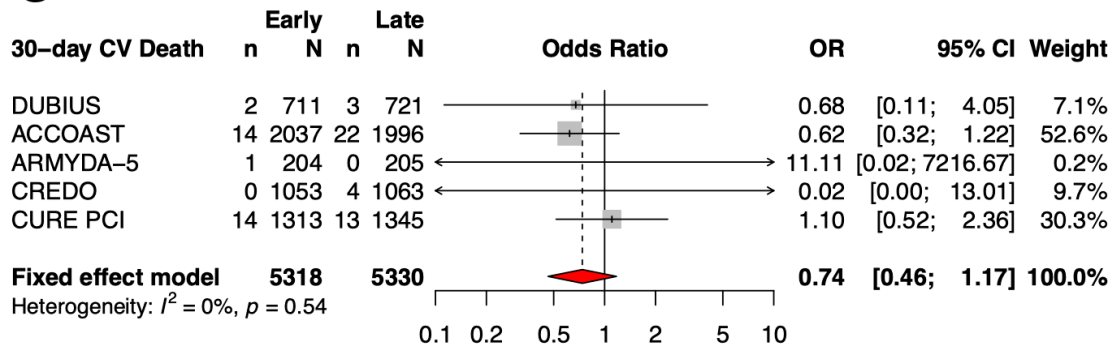

### D

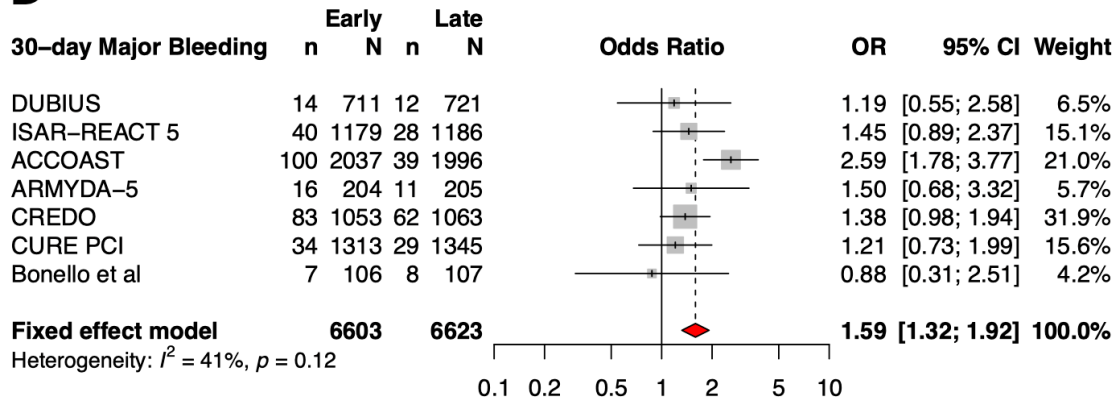

eFigure 4. Sensitivity Analysis Excluding PCI CURE From P2Y12 Inhibitor Subgroup Analysis

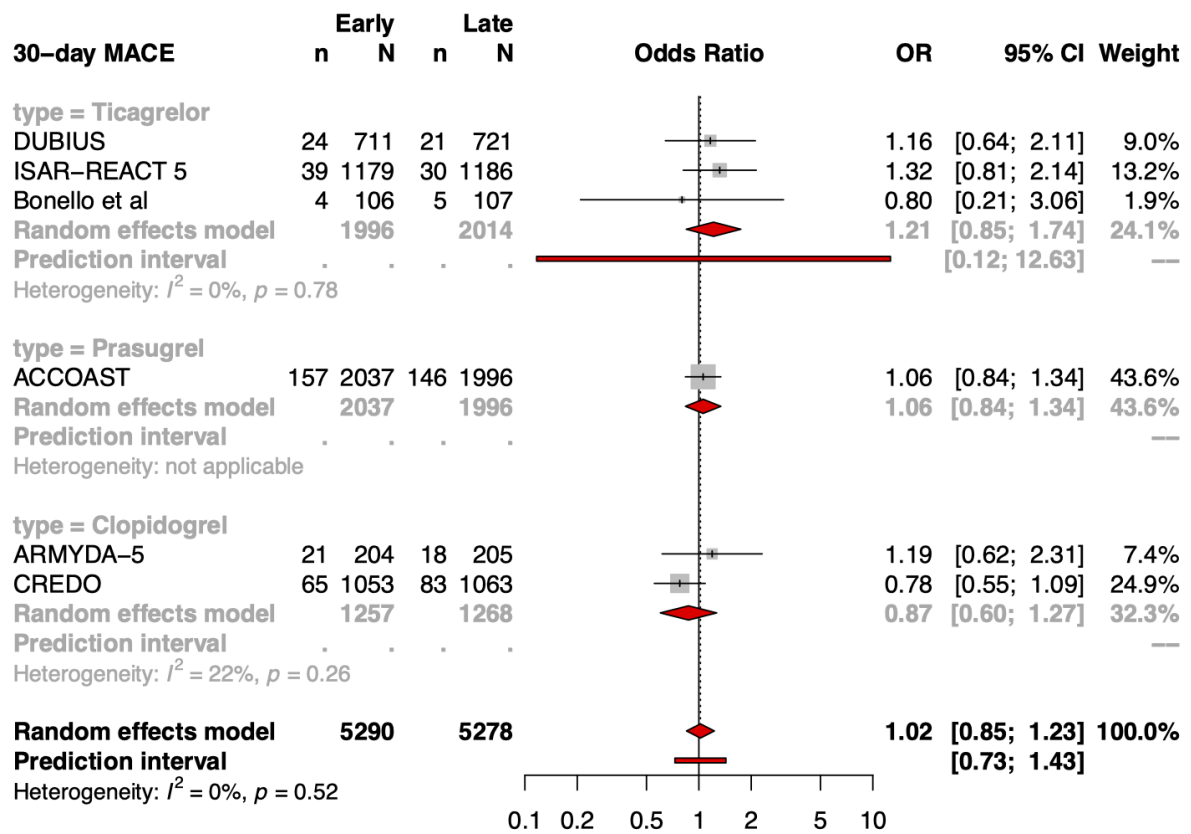

**eFigure 5. Subgroup Analyses for the Primary Safety End Point (Bleeding) Stratified by (A) P2Y12 inhibitor used for pre-treatment, (B) revascularisation strategy, (C) arterial access site.**

**A P2Y12 Inhibitor**

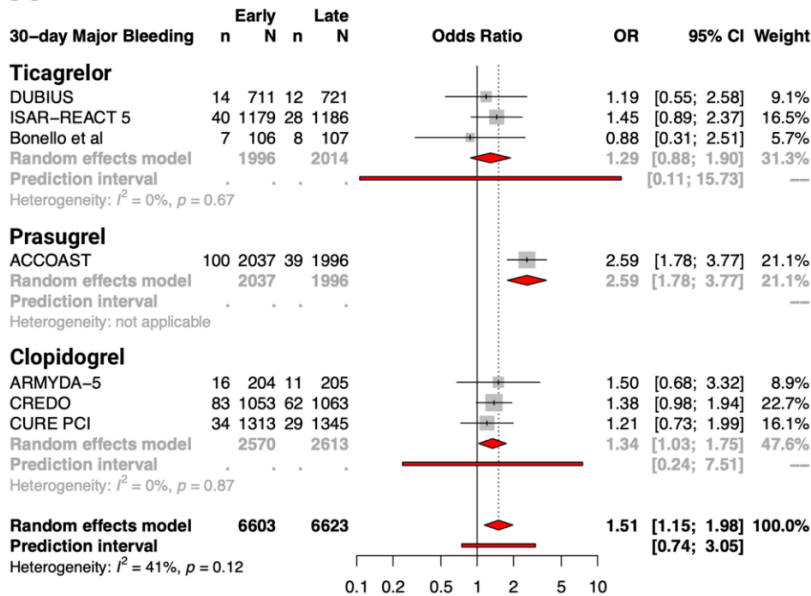

**B Indication**

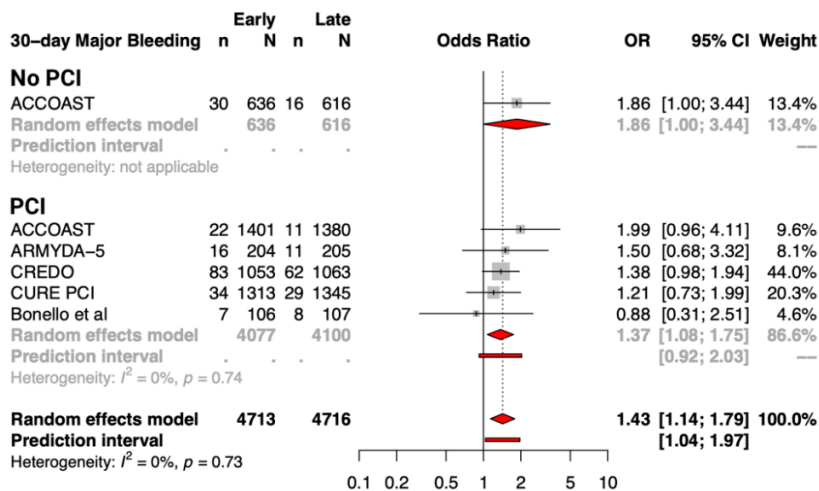

**C Access Site**

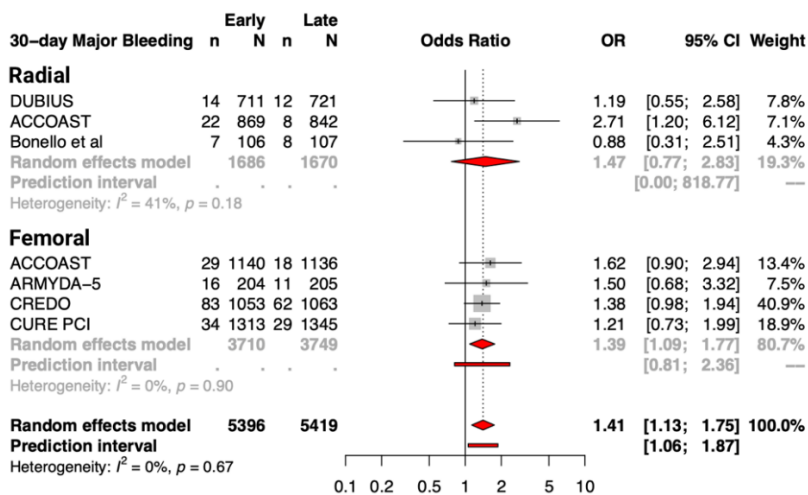

## eFigure 6. Leave-One-Out Sensitivity Analyses

eFigure 6a. Leave-one-out sensitivity analysis for 30-day MACE

### 30-day MACE

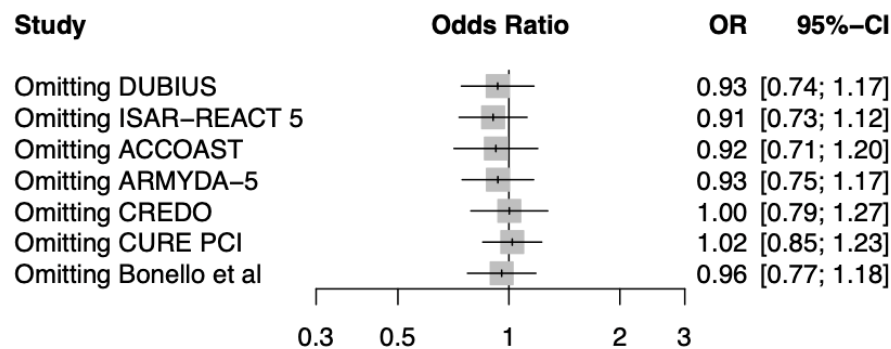

eFigure 6b. Leave-one-out sensitivity analysis for 30-day Major Bleeding

### 30-day Major Bleeding

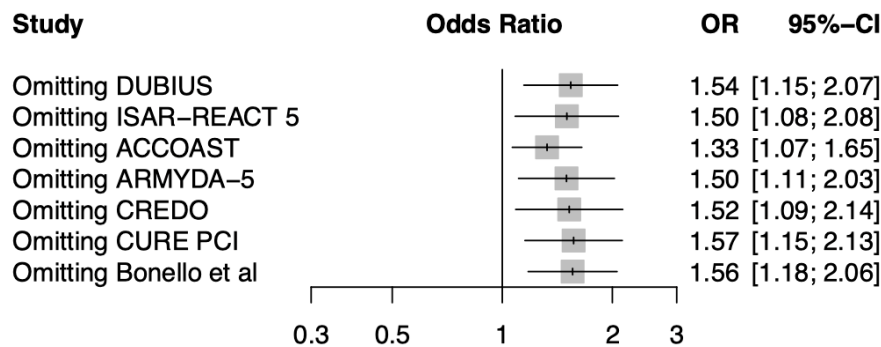

eFigure 6c. Leave-one-out sensitivity analysis for 30-day Cardiovascular Mortality

### 30-day CV Death

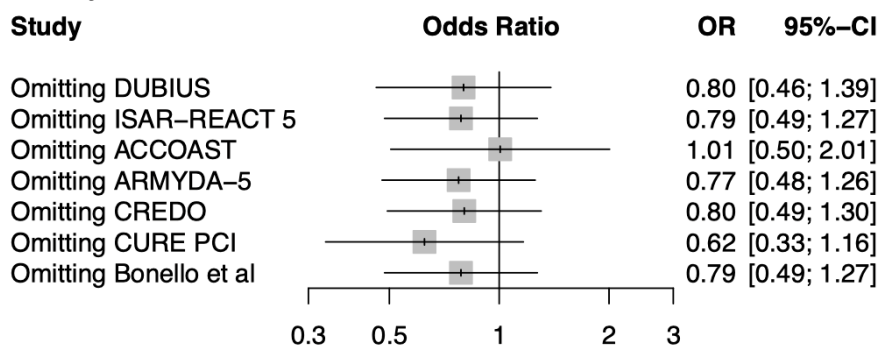

eFigure 6d. Leave-one-out sensitivity analysis for 30-day Myocardial Infarction

### 30-day Myocardial Infarction

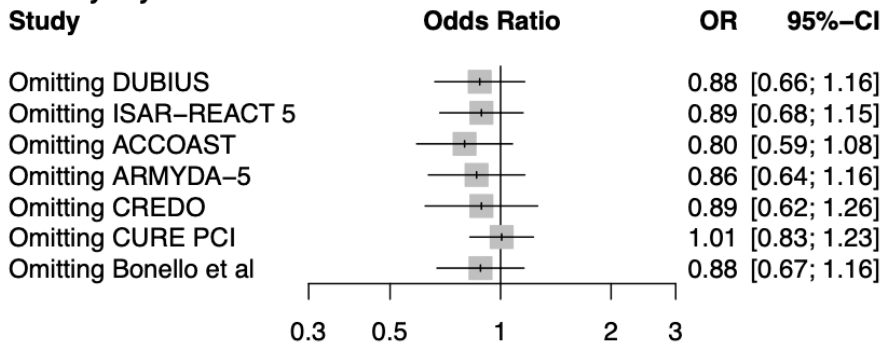

**eFigure 7. Metaregression Assessing Timing of Pretreatment Loading Dose**  
**eFigure 7a. Meta-regression assessing impact of P2Y12 inhibitor administration timing on 30-day MACE in all studies (meta-regression coefficient 0.0028, p=0.0629)**

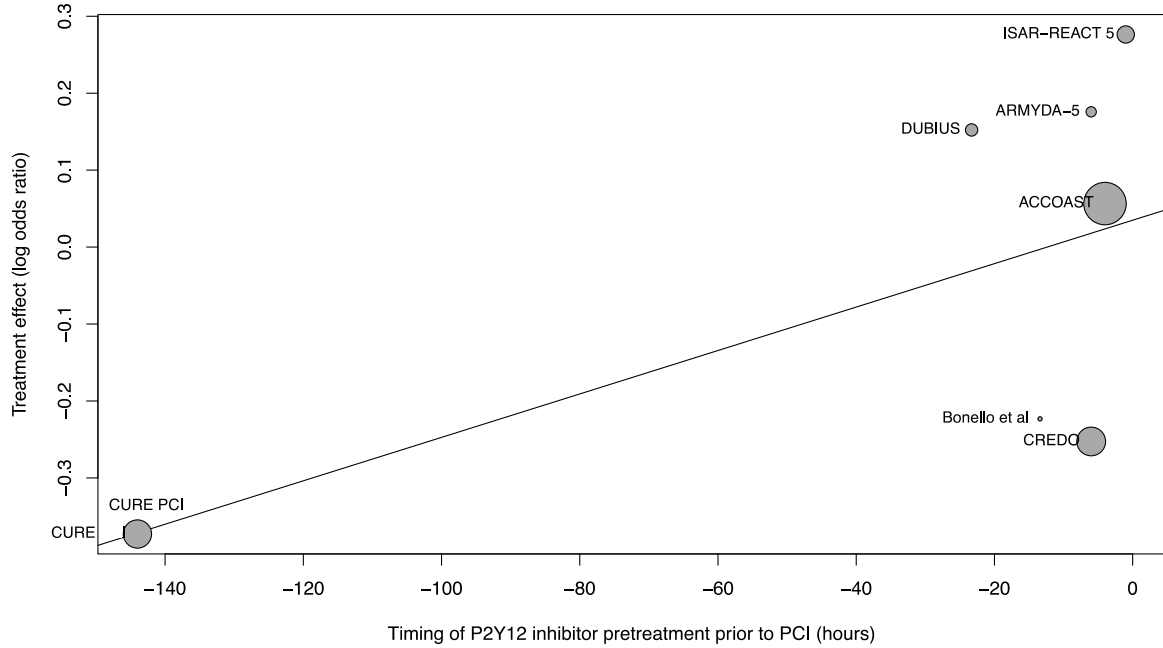

**eFigure 7b. Meta-regression assessing impact of P2Y12 inhibitor administration timing on 30-day MACE with CURE PCI trial excluded to more reflect a contemporary early invasive strategy (meta-regression coefficient 0.0006, p=0.0362)**

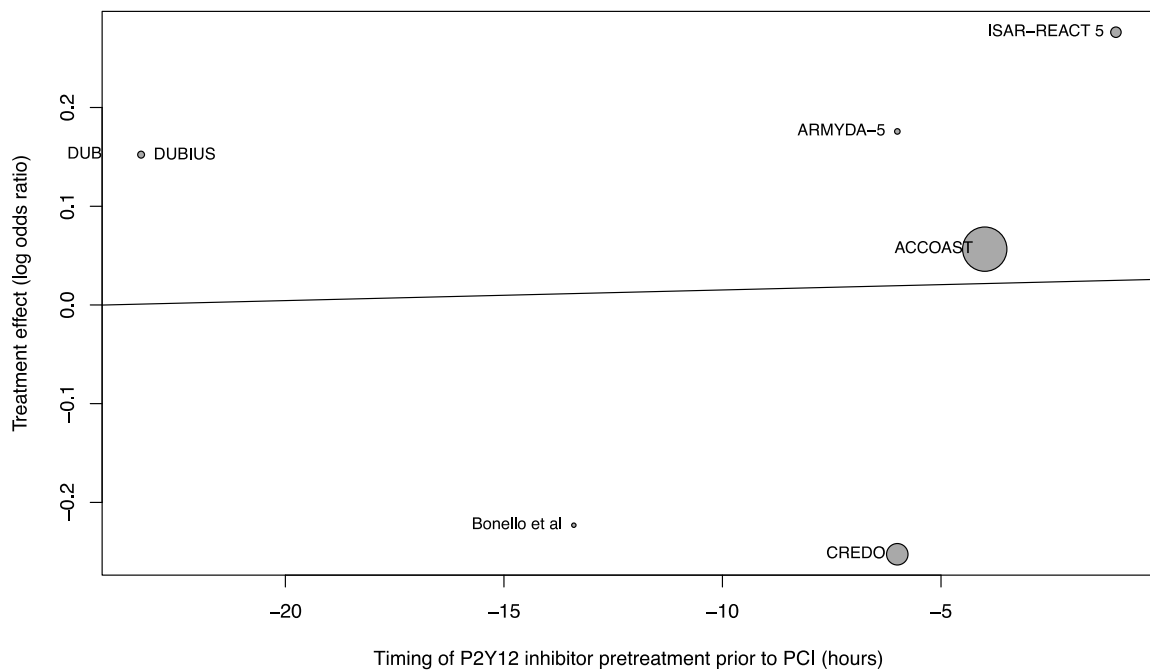

**eFigure 7c. Meta-regression assessing impact of P2Y12 inhibitor administration timing on 30-day major bleeding in all studies (meta-regression coefficient 0.0022, p=0.43)**

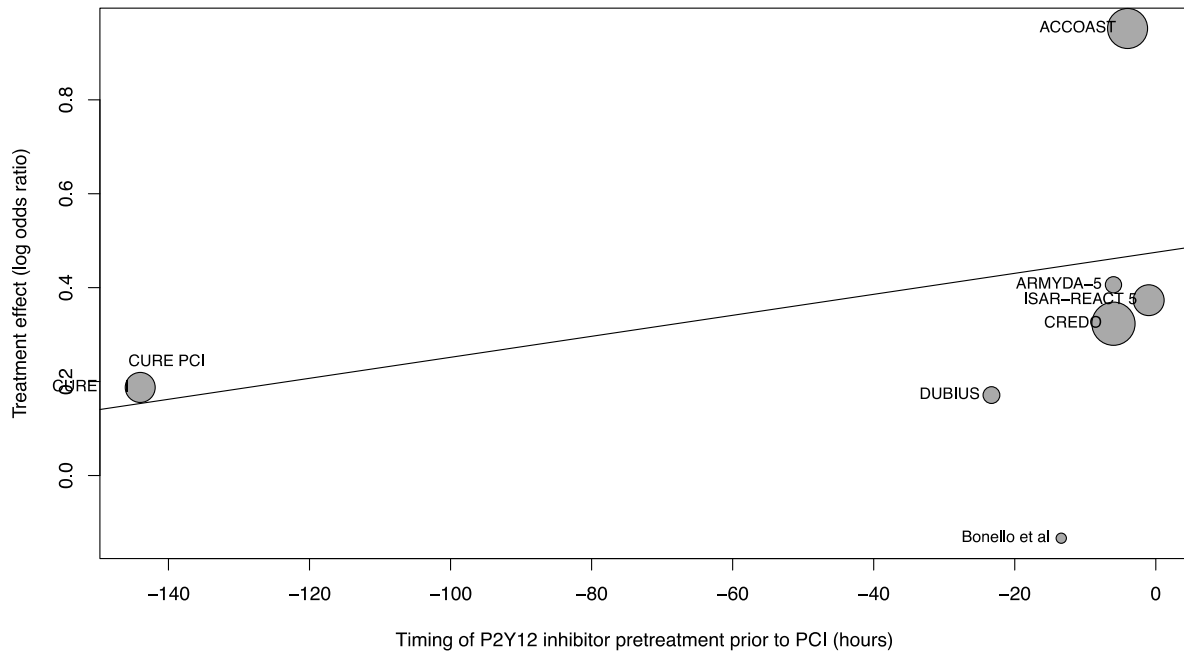

**eFigure 7d. Meta-regression assessing impact of P2Y12 inhibitor administration timing on 30-day major bleeding with CURE PCI trial excluded to more reflect a contemporary early invasive strategy (meta-regression coefficient 0.0240, p=0.3159)**

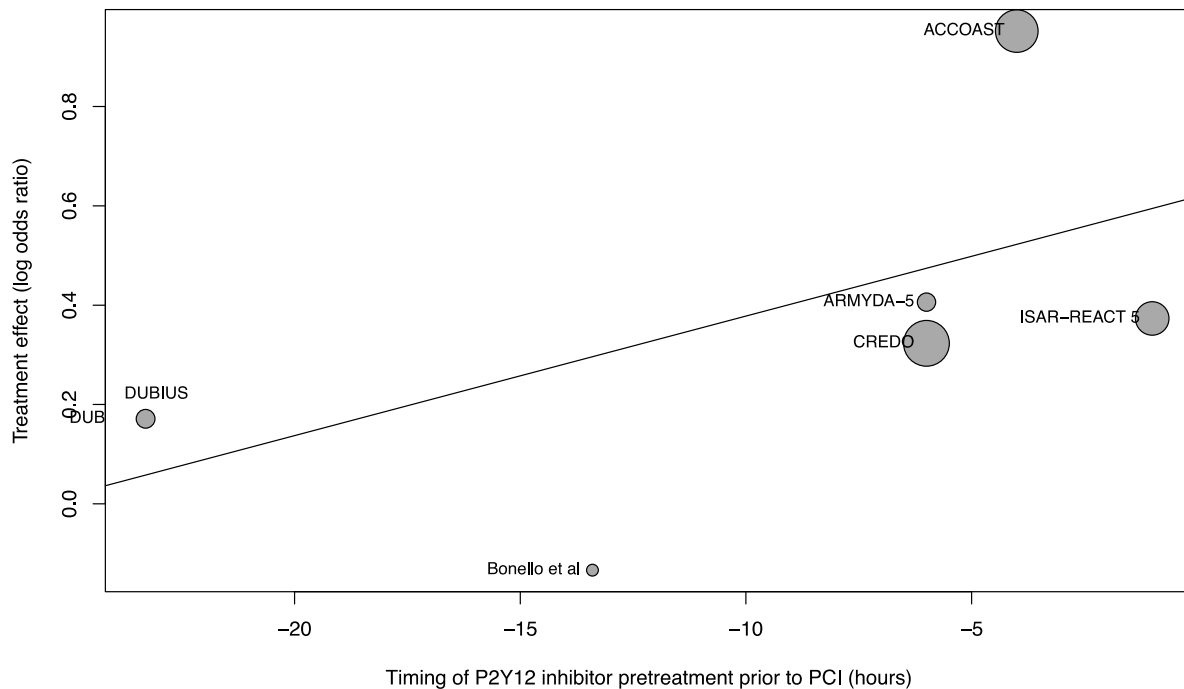



## References.

1. Mehta SR, Yusuf S, Peters RJG, Bertrand ME, Lewis BS, Natarajan MK, et al. Effects of pretreatment with clopidogrel and aspirin followed by long-term therapy in patients undergoing percutaneous coronary intervention: The pci-cure study. *Lancet*. 2001;358:527-533
2. Steinhubl SR, Berger PB, Mann JT, 3rd, Fry ET, DeLago A, Wilmer C, et al. Early and sustained dual oral antiplatelet therapy following percutaneous coronary intervention: A randomized controlled trial. *JAMA*. 2002;288:2411-2420
3. Di Sciascio G, Patti G, Pasceri V, Gatto L, Colonna G, Montinaro A, et al. Effectiveness of in-laboratory high-dose clopidogrel loading versus routine pre-load in patients undergoing percutaneous coronary intervention: Results of the armyda-5 preload (antiplatelet therapy for reduction of myocardial damage during angioplasty) randomized trial. *Journal of the American College of Cardiology*. 2010;56:550-557
4. Montalescot G, Collet JP, Ecollan P, Bolognese L, Ten Berg J, Dudek D, et al. Effect of prasugrel pre-treatment strategy in patients undergoing percutaneous coronary intervention for nstemi: The accoast-pci study. *Journal of the American College of Cardiology*. 2014;64:2563-2571
5. Montalescot G, Bolognese L, Dudek D, Goldstein P, Hamm C, Tanguay JF, et al. Pretreatment with prasugrel in non-st-segment elevation acute coronary syndromes. *New England Journal of Medicine*. 2013;369:999-1010
6. Bonello L, Laine M, Cluzel M, Frere C, Mancini J, Hasan A, et al. Comparison of ticagrelor versus prasugrel to prevent periprocedural myonecrosis in acute coronary syndromes. *American Journal of Cardiology*. 2015;116:339-343
7. Valina C, Neumann FJ, Menichelli M, Mayer K, Wohrle J, Bernlochner I, et al. Ticagrelor or prasugrel in patients with non-st-segment elevation acute coronary syndromes. *Journal of the American College of Cardiology*. 2020;76:2436-2446
8. Tarantini G, Mojoli M, Varbella F, Caporale R, Rigattieri S, Ando G, et al. Timing of oral p2y12 inhibitor administration in non-st elevation acute coronary syndrome. *Journal of the American College of Cardiology*. 2020
9. Dworeck C, Redfors B, Angerås O, Haraldsson I, Odenstedt J, Ioanes D, et al. Association of pretreatment with p2y12 receptor antagonists preceding percutaneous coronary intervention in non-st-segment elevation acute coronary syndromes with outcomes. *JAMA Netw Open*. 2020;3:e2018735
10. Verdoia M, Pergolini P, Barbieri L, Rolla R, Nardin M, Negro F, et al. Impact of pre-procedural dual antiplatelet therapy on periprocedural myocardial infarction in patients undergoing percutaneous coronary interventions with adjunctive tirofiban. *Thrombosis Research*. 2018;164:17-23
11. Sukul D, Seth M, Dixon SR, Khandelwal A, Lalonde TA, Gurm HS. Contemporary trends and outcomes associated with the preprocedural use of oral p2y12 inhibitors in patients undergoing percutaneous coronary intervention: Insights from the blue cross blue shield of michigan cardiovascular consortium (bmc2). *Journal of Invasive Cardiology*. 2017;29:340-351
12. Yudi MB, Eccleston D, Andrianopoulos N, Farouque O, Duffy SJ, Brennan A, et al. Pre-treatment with dual antiplatelet therapy in patients with non-st-segment elevation acute coronary syndromes undergoing percutaneous coronary intervention. *Internal Medicine Journal*. 2015;45:1032-1037

13. Ikegami Y, Kohsaka S, Miyata H, Ueda I, Fuse J, Sakamoto M, et al. Outcomes of percutaneous coronary intervention performed with or without preprocedural dual antiplatelet therapy. *Circulation Journal*. 2015;79:2598-2607
14. Almendro-Delia M, Gonzalez-Torres L, Garcia-Alcantara A, Reina-Toral A, Sanchez JAA, Yanez JCR, et al. Prognostic impact of clopidogrel pretreatment in patients with acute coronary syndrome managed invasively. *Am. J. Cardiol*. 2015;115:1019-1026
15. Wang TY, White JA, Tricoci P, Giugliano RP, Zeymer U, Harrington RA, et al. Upstream clopidogrel use and the efficacy and safety of early eptifibatid treatment in patients with acute coronary syndrome: An analysis from the early glycoprotein iib/iiia inhibition in patients with non-st-segment elevation acute coronary syndrome (early acs) trial. *Circulation*. 2011;123:722-730
16. Feldman DN, Kim LK, Minutello RM, Bergman G, Moussa I, Wong SC. Can clopidogrel loading (600mg) be administered <2 hours pre-pci in patients presenting with acute coronary syndromes? *Journal of the American College of Cardiology*. 2010;55 (10 SUPPL 1):A206.E1942
17. Lincoff AM, Steinhubl SR, Manoukian SV, Chew D, Pollack Jr CV, Feit F, et al. Influence of timing of clopidogrel treatment on the efficacy and safety of bivalirudin in patients with non-st-segment elevation acute coronary syndromes undergoing percutaneous coronary intervention. An analysis of the acuity (acute catheterization and urgent intervention triage strategy) trial. *JACC: Cardiovascular Interventions*. 2008;1:639-648
18. Szük T, Gyöngyösi M, Homorodi N, Kristóf E, Király C, Edes IF, et al. Effect of timing of clopidogrel administration on 30-day clinical outcomes: 300-mg loading dose immediately after coronary stenting versus pretreatment 6 to 24 hours before stenting in a large unselected patient cohort. *Am Heart J*. 2007;153:289-295
19. Dery JP, Campbell ME, Mathias J, Pieper KS, Harrington RA, Madan M, et al. Complementary effects of thienopyridine pretreatment and platelet glycoprotein iib/iiia integrin blockade with eptifibatid in coronary stent intervention; results from the esprit trial. *Catheter Cardiovasc Interv*. 2007;70:43-50
20. Chan AW, Moliterno DJ, Berger PB, Stone GW, DiBattiste PM, Yakubov SL, et al. Triple antiplatelet therapy during percutaneous coronary intervention is associated with improved outcomes including one-year survival: Results from the do tirofiban and reoprogive similar efficacy outcome trial (target). *J Am Coll Cardiol*. 2003;42:1188-1195
21. Assali AR, Salloum J, Sdringola S, Moustapha A, Ghani M, Hale S, et al. Effects of clopidogrel pretreatment before percutaneous coronary intervention in patients treated with glycoprotein iib/iiia inhibitors (abciximab or tirofiban). *Am J Cardiol*. 2001;88:884-886, a886
